# Supplementary material
Source: PubMed Central journal article supplement (PMC4407731)
Supplement: supp_mol.114.096743_Supplemental_data_96743.pdf [file supp_mol.114.096743_Supplemental_data_96743.pdf]

**Title: Exposure to diethylstilbestrol during pregnancy modulates microRNAs expression profile in mothers and fetuses reflecting oncogenic and immunological changes**

**Authors: Narendra P. Singh, Iqbal K. Abbas, Martin Menard, Udai P. Singh, Jiajia Zhang, Prakash Nagarkatti, and Mitzi Nagarkatti**

Table 1: Real-Time PCR to measure expression level of miRs

| miRBase ID      | Target Sequences        | QIAGEN Cat No |
|-----------------|-------------------------|---------------|
| Mmu-miR-18b_st  | UAAGGUGCAUCUAGUGCUGUUAG | MS00011326    |
| Mmu-miR-23a_st  | AUCACAUUGCCAGGGAUUUCC   | MS00007266    |
| Mmu-miR-30_st   | UGUAAACAUCCUCGACUGGAAG  | MS00011704    |
| Mmu-miR-31_st   | AGGCAAGAUGCUGGCAUAGCUG  | MS00001407    |
| Mmu-miR-146a_st | UGAGAACUGAAUCCAUGGGUU   | MS00001638    |
| Mmu-miR-155_st  | CUCCUACCUGUUAGCAUUAAC   | MS00024255    |
| Mmu-miR-217_st  | CAUCAGUUCCUAAUGCAUUGCCU | MS00024605    |
| Mmu-miR-320_st  | GCCUUCUCUCCCCGGUUCUCC   | MS00025550    |

Table 2: Showing miRs and complementary regions and binding affinity with 3' UTR regions of Fas and FasL gene

|                                                                                                                                                                                                                                                                                                                                                     |
|-----------------------------------------------------------------------------------------------------------------------------------------------------------------------------------------------------------------------------------------------------------------------------------------------------------------------------------------------------|
| <p><b>miR-18b and FasL 3'UTR Binding</b></p> <p>3' gauugUCGUGA - -UCUAC -GUGGAAu 5' mmu-miR-18b<br/>     :                  <br/>310:5' uuuuaACCAUUGAAGAAGACACCUUu 3' FasL</p> <p><b>miR-23a and Fas 3'UTR Binding</b></p> <p>3' ccUUUAGGGACCG-UUACACUa 5' mmu-miR-23a<br/>      : :   :            <br/>244:5' ugAAAUUUGUAUUAUAAAUGUGAA 3' Fas</p> |
|-----------------------------------------------------------------------------------------------------------------------------------------------------------------------------------------------------------------------------------------------------------------------------------------------------------------------------------------------------|

Table 3: Showing some of important upregulated and downregulated miRs in fetal thymocytes post DES exposure, when compared to VEH -treated fetal thymuses

| <b>miRs</b>  | <b>Fold Increase</b> |
|--------------|----------------------|
| mmu-miR-540  | 1.5                  |
| mmu-miR-466f | 2.4                  |
| mmu-miR-101  | 1.6                  |
| mmu-miR-466g | 2.8                  |
| mmu-miR-126  | 1.6                  |
| mmu-miR-1195 | 2.0                  |
| mmu-miR-1198 | 1.9                  |
| mmu-miR-186  | 1.6                  |
| mmu-miR-331  | 1.5                  |
| mmu-miR-433  | 2.1                  |
| mmu-miR-200c | 1.6                  |
| mmu-miR-19a  | 1.9                  |
| mmu-miR-709  | 1.5                  |
| mmu-miR-133b | 1.8                  |
| mmu-miR-206  | 1.9                  |
| mmu-miR-1224 | 1.7                  |
| mmu-miR-320  | 2.0                  |
| mmu-miR-377  | 2.1                  |
| mmu-miR-700  | 2.8                  |
| mmu-miR-879  | 1.9                  |
| mmu-miR-342  | 1.6                  |
| mmu-miR-676  | 2.1                  |
| mmu-miR-1187 | 1.8                  |

| <b>miRs</b>                     | <b>Fold Decrease</b> |
|---------------------------------|----------------------|
| mmu-miR-let-7e                  | -1.8                 |
| mmu-miR-196a-1// mmu-miR-196a-2 | -1.6                 |
| mmu-miR-26b                     | -2.3                 |
| mmu-miR-330                     | -2.5                 |
| mmu-miR-192                     | -1.9                 |
| mmu-miR-148b                    | -1.9                 |
| mmu-miR-30a                     | -2.1                 |
| mmu-miR-298                     | -1.8                 |
| mmu-miR-669-1//669-a-2//669a-3  | -1.5                 |
| mmu-miR-717                     | -2.0                 |
| mmu-miR-18a                     | -2.1                 |
| mmu-miR-200a                    | -1.5                 |
| mmu-miR-692-1                   | -1.8                 |
| mmu-miR-23a                     | -2.2                 |
| mmu-miR-23b                     | -1.5                 |
| mmu-miR-691                     | -1.9                 |
| mmu-miR-146a                    | -1.7                 |
| mmu-miR-146b                    | -1.7                 |
| mmu-miR-449a                    | -2.5                 |
| mmu-miR-31                      | -2.4                 |
| mmu-miR-18a                     | -1.5                 |
| mmu-miR-18b                     | -2.5                 |
| mmu-miR-301a                    | -2.0                 |
| mmu-miR-98                      | -2.1                 |
